# Supplementary material
Source: PubMed Central journal article supplement (PMC4199940)
Supplement: NIHMS574450-supplement-supplement_1.pdf [file NIHMS574450-supplement-supplement_1.pdf]

Supplementary Table 1: Cronbach's alpha

| Individual domain scores | < 12 years old | > =12 years old |
|--------------------------|----------------|-----------------|
| <b>CHIP</b>              |                |                 |
| Satisfaction             | 0.84           | 0.70            |
| Comfort                  | 0.83           | 0.82            |
| <b>KIDSCREEN-52</b>      |                |                 |
| Physical                 | 0.79           | 0.75            |
| Psychological            | 0.86           | 0.86            |
| <b>Kiddy KINDL</b>       |                |                 |
| Physical                 | 0.67           | N/A             |
| Psychological            | 0.60           | N/A             |
| <b>Kid/ Kiddo KINDL</b>  |                |                 |
| Physical                 | 0.76           | 0.71            |
| Psychological            | 0.67           | 0.69            |
| <b>PedsQL</b>            |                |                 |
| Physical                 | 0.83           | 0.79            |
| Emotional                | 0.75           | 0.81            |

Supplementary Table 2: Age group comparisons (<12 and >=12) of convergent/ discriminant validity† of the CHIP, the KIDSCREEN-52, the Kiddy KINDL, and the Kid/ Kiddo KINDL versus the anchor instrument (the PedsQL)

|                         | PedsQL‡        |             |                 |             |
|-------------------------|----------------|-------------|-----------------|-------------|
|                         | < 12 years old |             | >= 12 years old |             |
|                         | Physical       | Emotional   | Physical        | Emotional   |
| <b>CHIP</b>             |                |             |                 |             |
| Satisfaction            | 0.50           | <i>0.52</i> | 0.59            | <i>0.46</i> |
| Comfort                 | <b>0.54</b>    | 0.63        | <b>0.60</b>     | 0.53        |
| <b>KIDSCREEN-52</b>     |                |             |                 |             |
| Physical                | <b>0.54</b>    | 0.36        | <b>0.42</b>     | 0.35        |
| Psychological           | 0.40           | 0.58        | 0.48            | 0.53        |
| <b>Kiddy KINDL</b>      |                |             |                 |             |
| Physical                | 0.35           | 0.36        |                 |             |
| Psychological           | 0.37           | <b>0.37</b> |                 |             |
| <b>Kid/ Kiddo KINDL</b> |                |             |                 |             |
| Physical                | <b>0.52</b>    | 0.48        | <i>0.60</i>     | 0.51        |
| Psychological           | 0.45           | <b>0.59</b> | <b>0.55</b>     | <b>0.57</b> |

† Spearman's Rank coefficients; all values were significant at  $p < 0.05$

‡ Values in **bold** indicate the highest correlation coefficients between a specific domain of the PedsQL and individual domains of other three instruments; values in *italic* indicate hypothesized as a priori convergent validity: the moderate to high correlation coefficients between a specific domain of the PedsQL and homogeneous domains of other three instruments (e.g., physical domain of the PedsQL and physical domains all other instruments); values in regular font indicate hypothesized as a priori discriminant validity: the small correlations coefficients between a specific domain of the PedsQL and heterogeneous domains of other three instruments (e.g., physical domain of the PedsQL and financial domain of the KIDSCREEN-52).

§No domain was hypothesized a priori to be highly correlated between the CHIP and the PedsQL.

Supplementary Table 3: Age group comparisons (&lt;12 and &gt;=12) for known-groups validity

| Individual domain scores | Difference (Effect Size) † |                 |
|--------------------------|----------------------------|-----------------|
|                          | < 12 years old             | > =12 years old |
| <b>CHIP</b>              |                            |                 |
| Satisfaction             | 7.96 (0.62)**              | 7.08 (0.65)**   |
| Comfort                  | 7.85 (0.57)**              | 9.01 (0.70)**   |
| <b>KIDSCREEN-52</b>      |                            |                 |
| Physical                 | 13.04 (0.68)***            | 15.21 (0.78)**  |
| Psychological            | 10.70 (0.71)**             | 12.72 (0.73)**  |
| <b>Kiddy KINDL</b>       |                            |                 |
| Physical                 | 3.54 (0.20)                | N/A             |
| Psychological            | 1.05 (0.09)                | N/A             |
| <b>Kid/ Kiddo KINDL</b>  |                            |                 |
| Physical                 | 9.75 (0.51)**              | 8.69 (0.46)*    |
| Psychological            | 5.65 (0.36)*               | 6.75 (0.39)*    |
| <b>PedsQL</b>            |                            |                 |
| Physical                 | 10.70 (0.67)**             | 10.80 (0.54)**  |
| Emotional                | 12.09 (0.72)**             | 13.32 (0.67)**  |
| <b>Total scores</b>      |                            |                 |
| CHIP                     | 7.14 (0.65)**              | 8.38 (0.80)**   |
| KIDSCREEN-52             | 8.20 (0.65)                | 8.76(0.70)      |
| Kiddy KINDL              | 4.42 (0.31)                | N/A             |
| Kid/ Kiddo KINDL         | 8.77 (0.60)                | 6.45 (0.49)     |
| PedsQL                   | 12.04 (0.79)               | 12.27 (0.75)    |

† Effect size without covariate adjustment
